# Supplementary material
Source: Springer Nature journal article supplement (https://www.springermedizin.de/resource/supplementary/13046_2013_764_MOESM1_ESM.pdf/9662896)

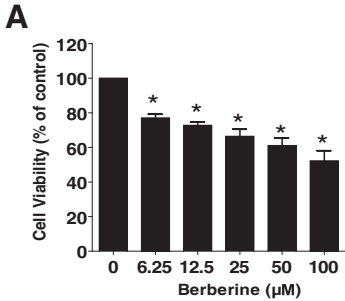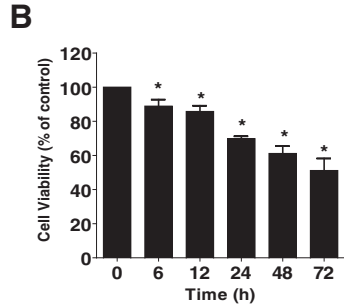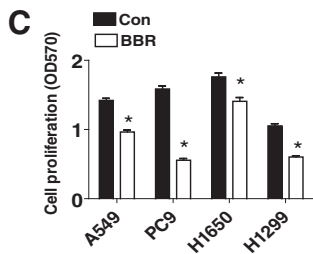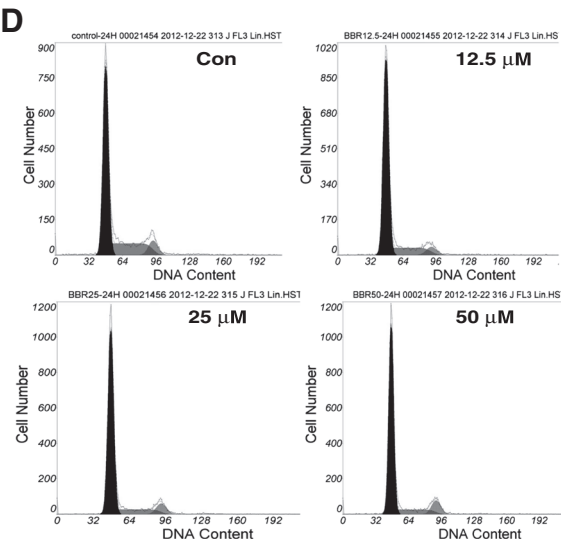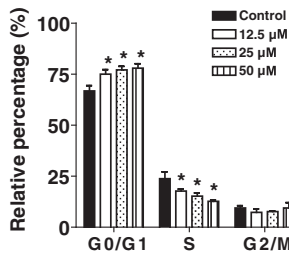

Supplement: MOESM1 [file 9662896]
